# Supplementary material for: HiIDDD: a high-throughput imaging pipeline for the quantitative detection of DNA damage in primary human immune cells
Source: PubMed Central journal article supplement (PMC9022135; doi:10.1038/s41598-022-10018-0), 2022-04-15
Supplement: 41598_2022_10018_MOESM1_ESM.pdf [file 41598_2022_10018_MOESM1_ESM.pdf]

**a**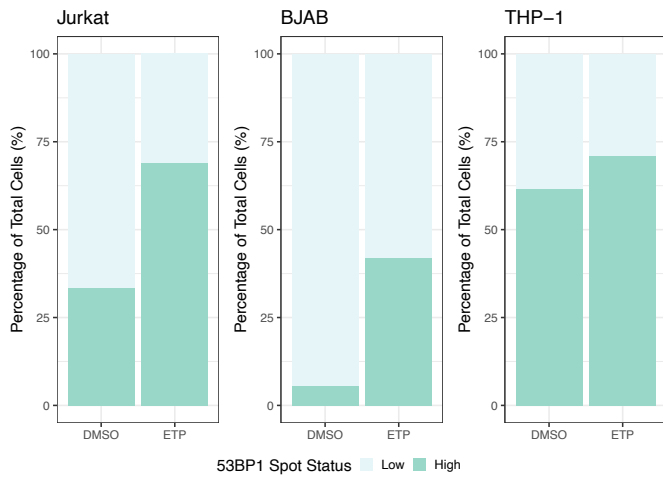**b**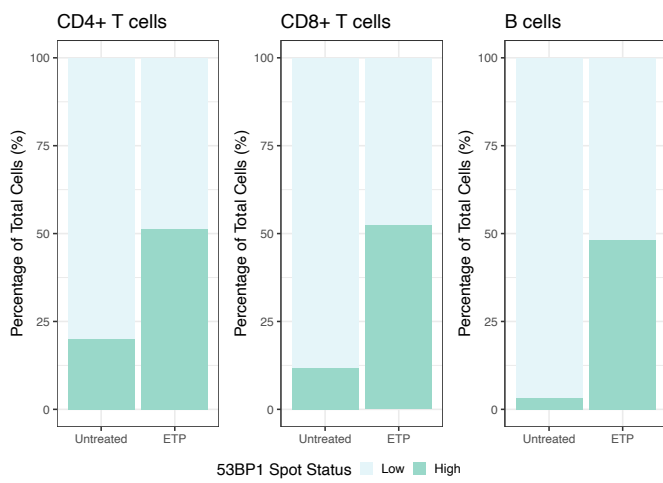**c**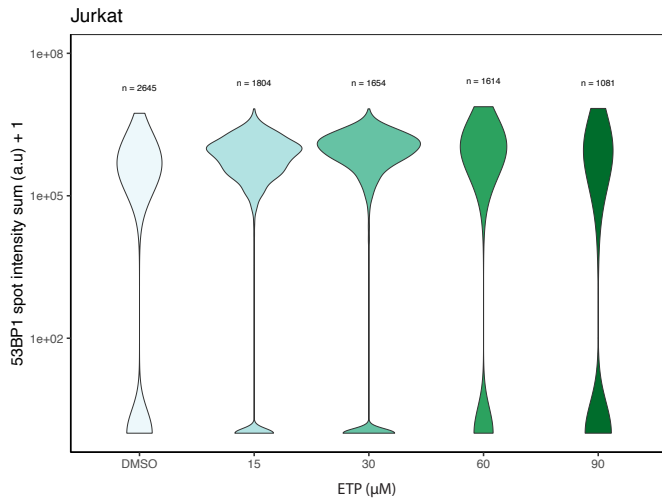**d**

| ETP treatment (μM) | Mean (a.u.) | SD (a.u.) | 53BP1 Positive (%) |
|--------------------|-------------|-----------|--------------------|
| DMSO               | 4.67E+05    | 5.86E+05  | 33.3               |
| 15                 | 8.65E+05    | 8.32E+05  | 58                 |
| 30                 | 1.07E+06    | 9.34E+05  | 69                 |
| 60                 | 9.70E+05    | 1.00E+06  | 59.2               |
| 90                 | 6.64E+05    | 9.35E+05  | 39.5               |

**e**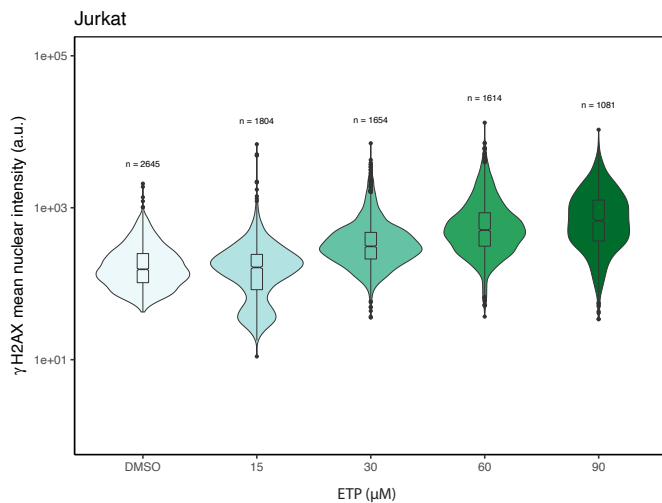**f**

| ETP treatment (μM) | Mean (a.u.) | SD (a.u.) | γ-H2AX Positive (%) |
|--------------------|-------------|-----------|---------------------|
| DMSO               | 2.00E+02    | 1.51E+02  | 12.4                |
| 15                 | 2.02E+02    | 3.05E+02  | 10.6                |
| 30                 | 4.32E+02    | 4.60E+02  | 42.3                |
| 60                 | 7.73E+02    | 8.64E+02  | 70.4                |
| 90                 | 9.52E+02    | 9.02E+02  | 76.4                |

**Supplementary Fig. 1) Detection of 53BP1 spot intensity in immune cells.** 53BP1 positive cells were characterized in each treatment group for **a)** immune cell lines (Jurkat, BJAB, and THP-1) and **b)** CD4<sup>+</sup>T cells, CD8<sup>+</sup>T cells, monocytes, and B cells. The same samples as in figures 2 and 3 are used. ETP Dose-response assay (0-90  $\mu$ M) in Jurkat cell line for **c, d)** 53BP1 spot intensity and **e, f)**  $\gamma$ -H2AX mean nuclear intensity detection.

**a**

| #  | Donor | Age | Sex |
|----|-------|-----|-----|
| 1  | ND791 | 30  | F   |
| 2  | ND782 | 31  | F   |
| 3  | Gt016 | 42  | F   |
| 4  | Gt024 | 47  | M   |
| 5  | Gt030 | 49  | M   |
| 6  | ND550 | 54  | F   |
| 7  | ND797 | 58  | F   |
| 8  | Gt004 | 62  | M   |
| 9  | ND334 | 67  | F   |
| 10 | Gt029 | 85  | M   |

**Supplementary Fig. 2) List of donors used in batch processing assay. a)** For each listed donor in Figure 5, donors were identified by age and sex.
